# Supplementary material for: virDTL: Viral Recombination Analysis Through Phylogenetic Reconciliation and Its Application to Sarbecoviruses and SARS-CoV-2
Source: PubMed Central journal article supplement — J Comput Biol. 2023 Jan 5;30(1):3–20. doi: 10.1089/cmb.2021.0507 (PMC10081712; doi:10.1089/cmb.2021.0507), 2023-01-05
Supplement: Supp_Data.pdf [file Supp_Data.pdf]

# Supplementary Material

## S1 Supplementary Text

### Selection of *Sarbecovirus* strains

Our choice of the 54 *Sarbecovirus* strains was driven by two considerations. First, we wanted to sample broadly from available *Sarbecovirus* whole genomes in order to adequately capture strain diversity, and second, we wanted to include strains with potential relevance for SARS-CoV-2 evolution. Accordingly, we started with the collection of 44 broadly sampled *Sarbecovirus* strains (one SARS-CoV-2 strain, one SARS-CoV strain, and 42 strains from bats) used in Jungreis et al. (2021), and augmented that collection with strains hosted in civet cats and pangolins due to their proposed role as zoonotic origins for the SARS (2003) (Guan et al., 2003) and SARS-CoV-2 (2019) (Zhang et al., 2020) pandemics. A complete list of the chosen strains is available in Supplementary Table S1. For each strain, the complete genome sequence was obtained from the NCBI sequence database (NCBI Resource Coordinators, 2018).

Throughout this study, we reference results of Boni et al. (2020) and Makarenkov et al. (2021). Boni et al. include 19 strains in their analysis that we leave out, including 279\_2005, JL2012, JTMC15, SX2013, Rs4874, RsSHC014, Rs3367, Longquan\_140, HKU3-[2-6,8-11,13], and Pangolin-CoV. As these strains have a close relative HKU-3-[1,7,12] that is included in our analysis, and the strains do not represent new hosts, their exclusion should not alter results substantially. We include two additional strains, 16BO133 and 273\_2005. Makarenkov et al. includes 6 strains that we leave out, including Guangdong\_Pangolin\_1\_2019, Guangdong\_Pangolin\_P2S\_2019, HKU3-6, and three SARS-CoV-2 strains (Australia VIC231 2020, USA UT 00346 2020, Hu Italy TE4836 2020). As mentioned in Makarenkov et al., the SARS-CoV-2 strains are very similar and therefore do not add further information to the analysis.

### Strain tree reconstruction using BEAST

We estimated a dated strain tree for each of the three aligned regions/whole genome using BEAST v.1.10.4 (Suchard et al., 2018). Following Boni et al. (2020), we used a GTR+ $\Gamma$  substitution model and an uncorrelated relaxed clock model with a log-normal distribution. We used a normal distribution with mean 0.00078 and standard deviation 0.0003 as an informative rate prior, based on estimated rates for MERS-CoV (Boni et al., 2020), and ran BEAST until chains were sufficiently mixed, generally for more than 10 million iterations, with effective sample sizes greater than 100 for branch lengths and root ages. We rooted each strain tree using the outgroup containing the strains from Bulgaria 2008 [BM48-31] and Kenya 2007 [BtKY72], which were identified in Boni et al. (2020) as the most evolutionarily distant strains. Given the rooted strain trees, we again ran BEAST until chains were sufficiently mixed, using topology-preserving operations only to estimate divergence times for each ancestral strain.

## Construction of gene families

For each annotated gene, we extracted and used the longest protein sequence for that gene. For strains that did not have all 11 genes annotated, we aligned their full genome to the longest annotated gene sequence among other strains and extracted the overlapping alignment. Almost all gene families, with the exception of *ORF1ab*, *spike*, and *nucleocapsid*, were unannotated in at least one strain. Using this approach, we were able to confidently identify the missing genes for an additional 5 gene families, resulting in a total of 8 complete gene families (with one gene from each of these gene families present in each strain). Two of the gene families, *ORF10* and *ORF6*, could not be detected in strains KJ473815.1 and KJ473816.1. Finally, *ORF8*, which was initially annotated in only 31 of the 54 strains, could not be detected in 10 strains.

## Orthogonal verification of *spike* HGTs using Simplot

We assessed the accuracy of additional recombination events inferred through virDTL using SimPlot. Specifically, we used SimPlot to analyse the donor, recipient, and recipient-sister strains to orthogonally verify each of the five other highly supported HGTs identified by virDTL in the *spike* gene. The *spike* gene is a good candidate for such a SimPlot analysis since it is sufficiently long for recombinations to be easily visible and interpretable. We find a clear signal for recombination in the *spike* gene for each of the five cases (Figure S3). In three of the cases (F46 to Rf4092, Rs4081 to YN2018D, and Anlong-103 to YN2013), the recombination affects predominantly the *spike* gene region. In the other two cases (Jiyuan.84 to HeB2013 and Rs9401 to Rs7327), the donor sequence is more similar to the recipient sequence along the majority of the genome. Possible explanations include that the *spike* gene HGT may be part of a larger recombination event, that the *spike* gene HGT may be an artifact of incorrect placement of the affected strains in the strain tree, or that the recipient sister sequence has undergone rapid evolution. Analysis of the sequences and dated species tree suggest the latter is more likely for the transfer from Jiyuan.84 to HeB2013, while the transfer from Rs9401 to Rs7327 is more likely due to a multi-gene recombination.

## S2 Supplementary Figures and Tables

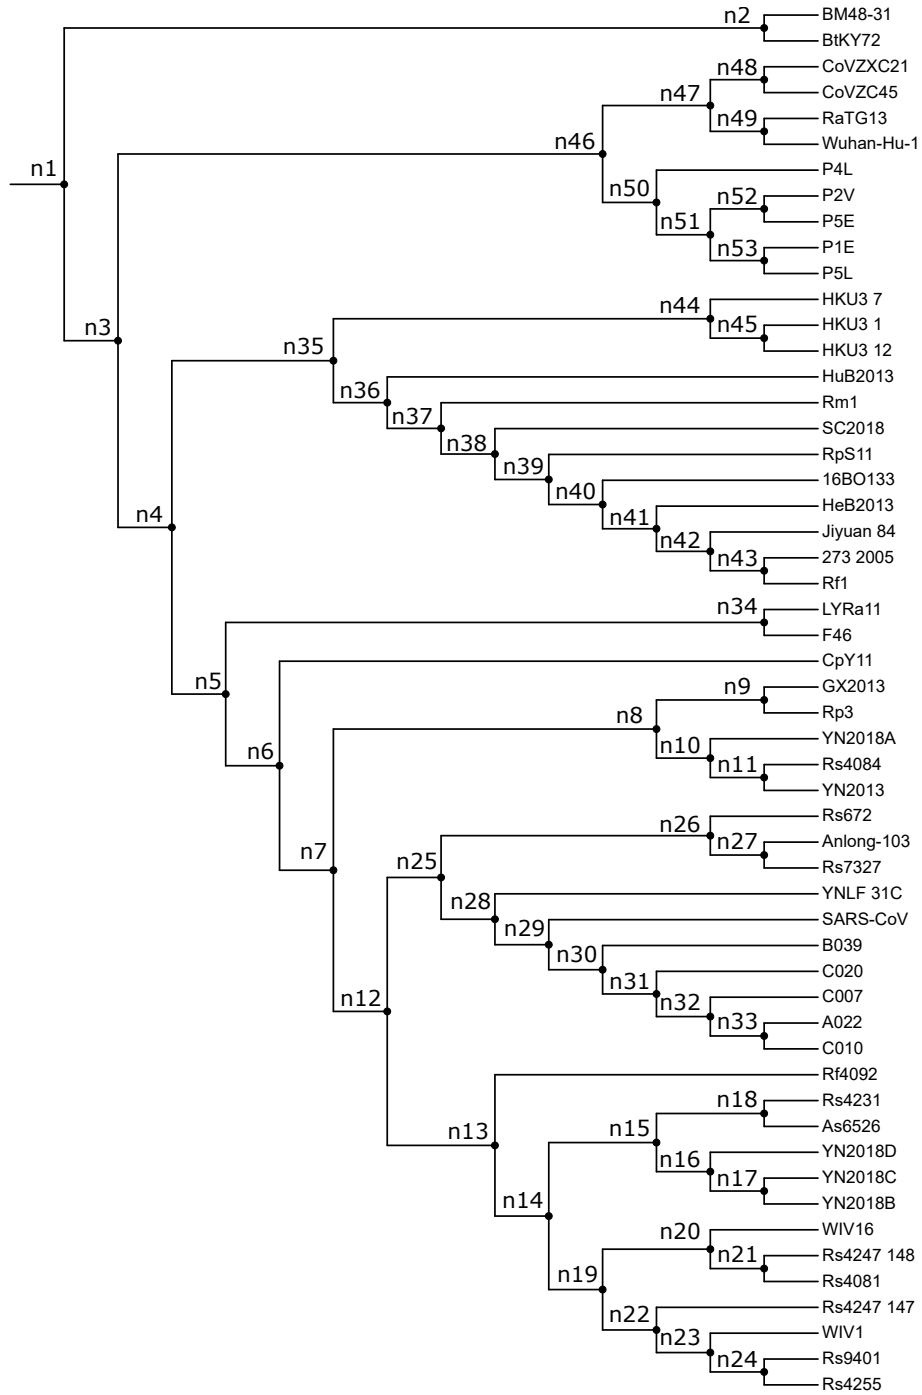

Figure S1: Full strain tree (NRR-B) and internal node labels.

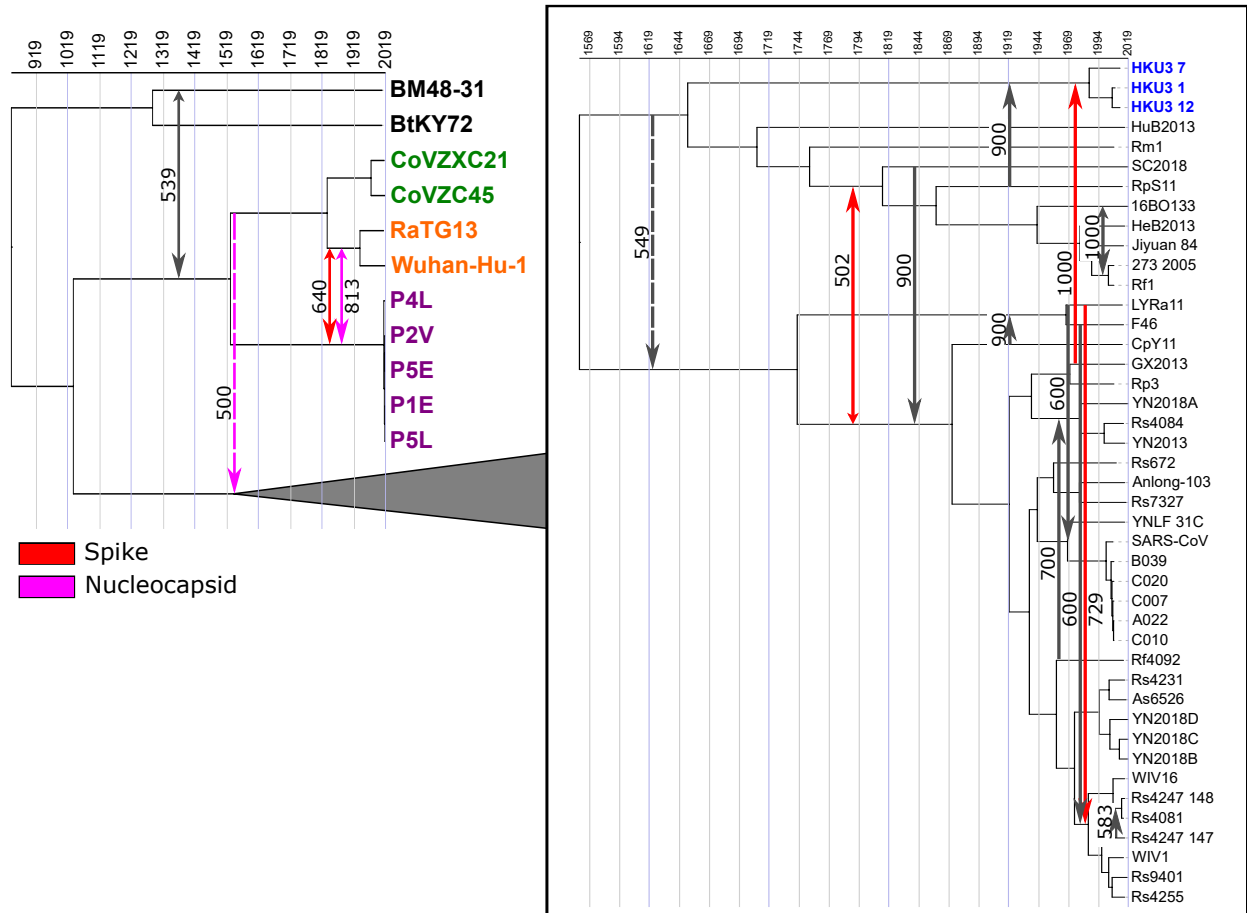

Figure S2: **Highly-supported time-consistent HGTs in the *Sarbecovirus* subgenus.** Time-consistent HGTs with an ancestral recipient and greater than 500 support are shown on a dated strain tree. Support values are shown for OptRoot-rooted gene trees, with transfers in the *spike* (red) and *nucleocapsid* genes (pink) highlighted. Smaller arrows indicate there also exists an HGT with at least 100 support in the reverse direction, suggesting directional uncertainty. All HGTs shown are also supported using MAD-rooted gene trees except one transfer in the *nucleocapsid* and one in the *membrane* (dashed lines).

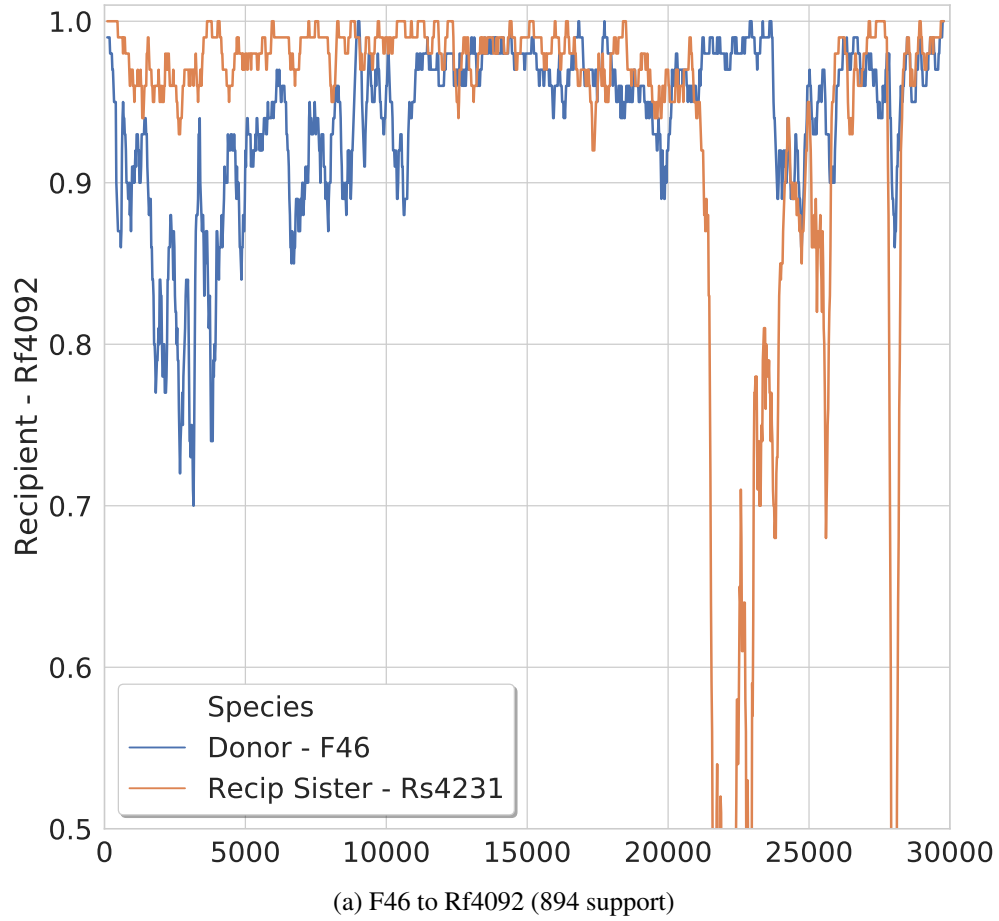

Figure S3: **SimPlot Validation of leaf-to-leaf HGTs.** Part (a): SimPlot for highly supported leaf-to-leaf HGT in the *spike* gene family from F46 to Rf4092. Figure continued on next page.

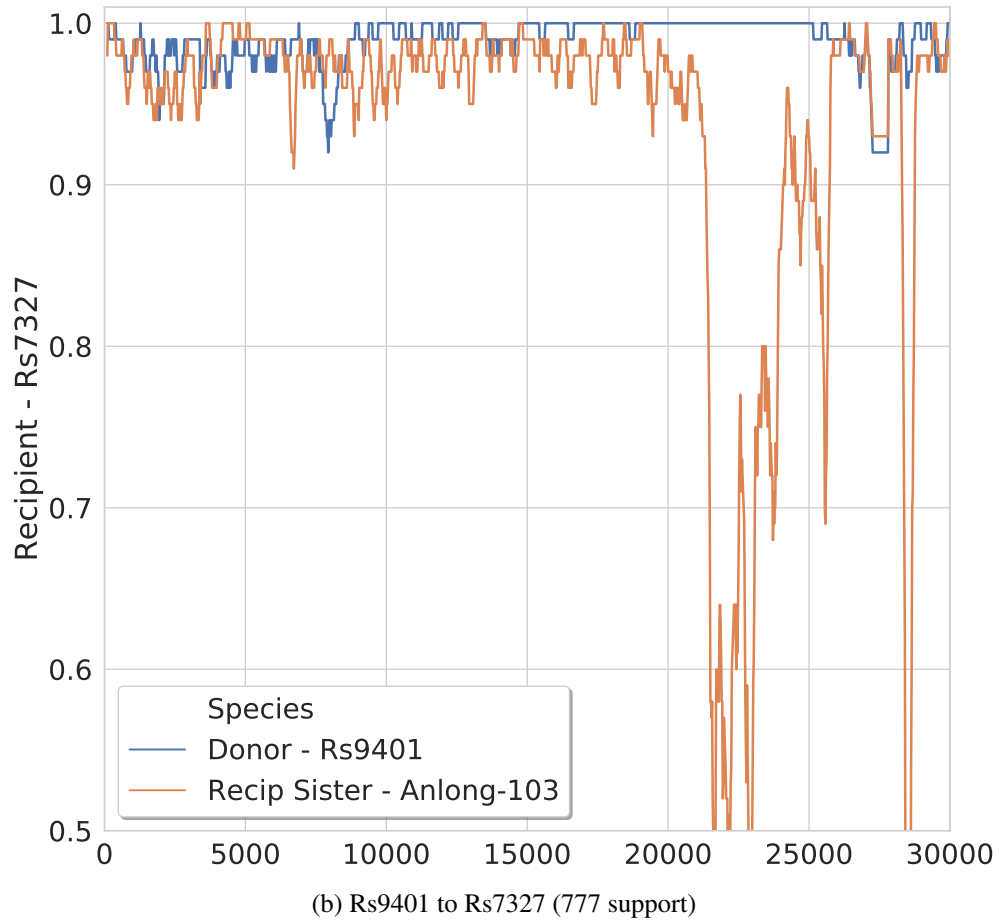

Figure S3: **SimPlot Validation of leaf-to-leaf HGTs.** Part (b): SimPlot for highly supported leaf-to-leaf HGT in the *spike* gene family from Rs9401 to Rs7327. Figure continued on next page.

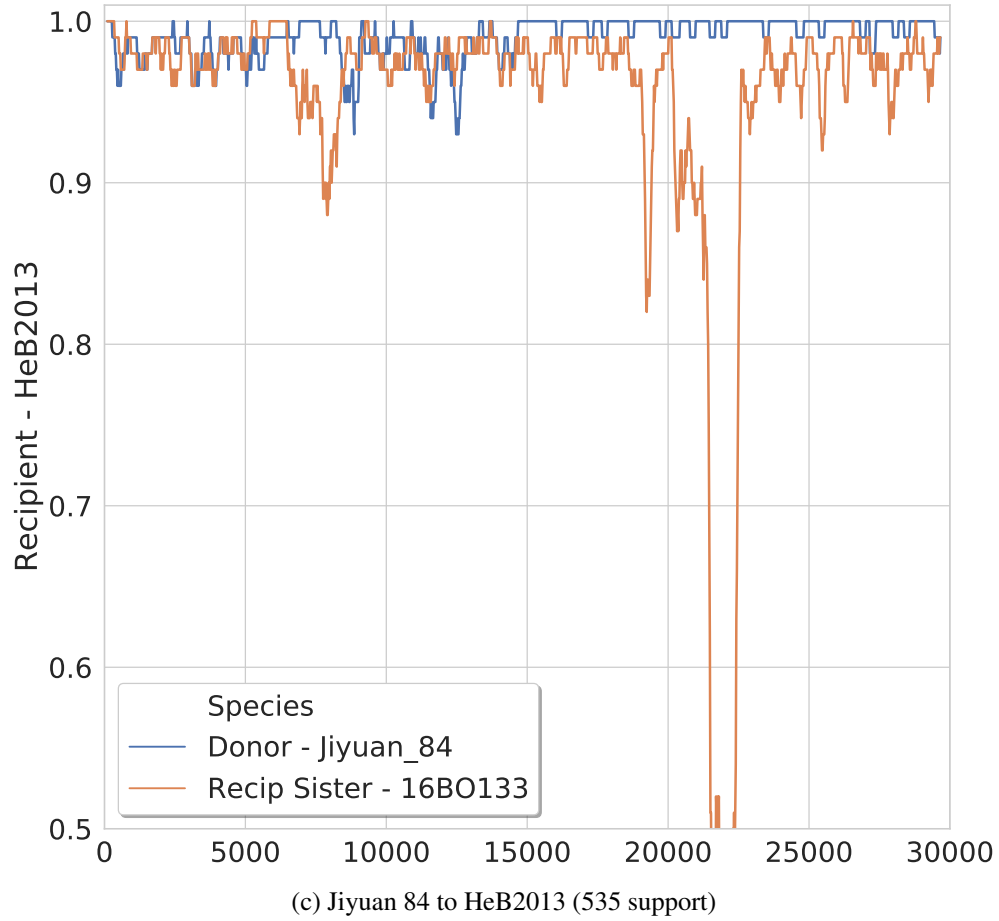

Figure S3: **SimPlot Validation of leaf-to-leaf HGTs.** Part (c): SimPlot for highly supported leaf-to-leaf HGT in the *spike* gene family from Jiyuan\_84 to HeB2013. Figure continued on next page.

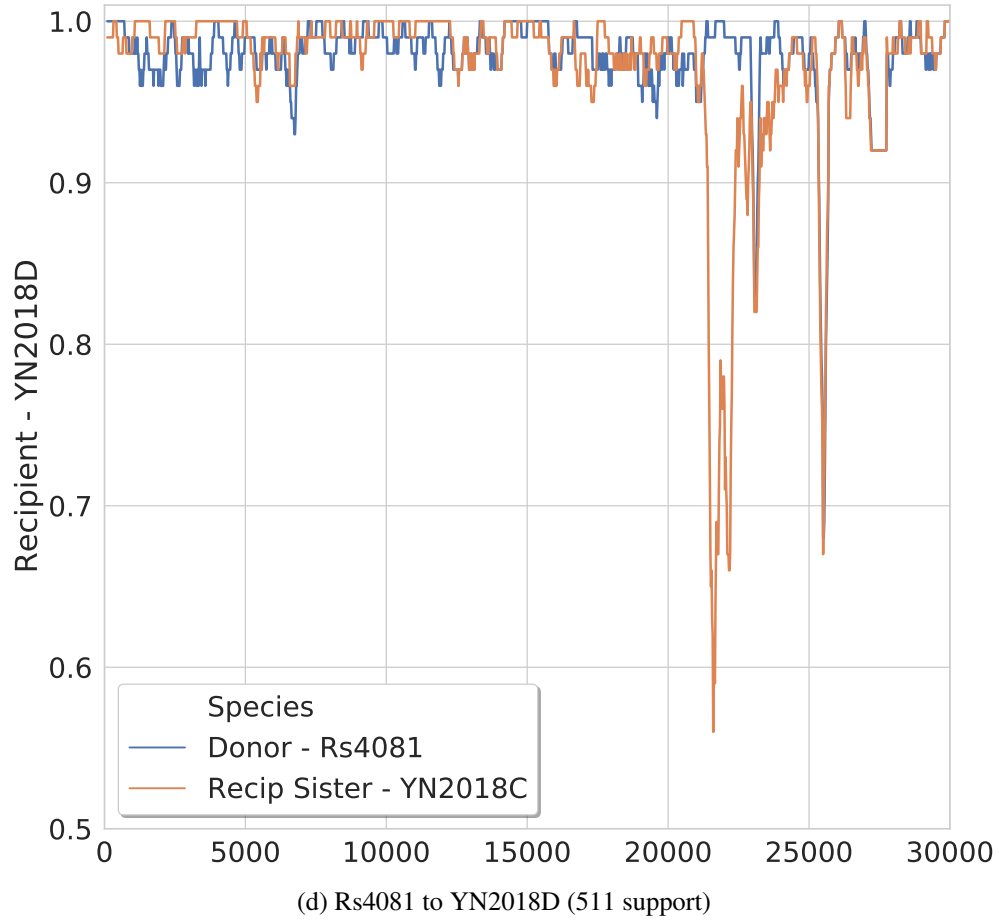

Figure S3: **SimPlot Validation of leaf-to-leaf HGTs.** Part (d): SimPlot for highly supported leaf-to-leaf HGT in the *spike* gene family from Rs4081 to YN2018D. Figure continued on next page.



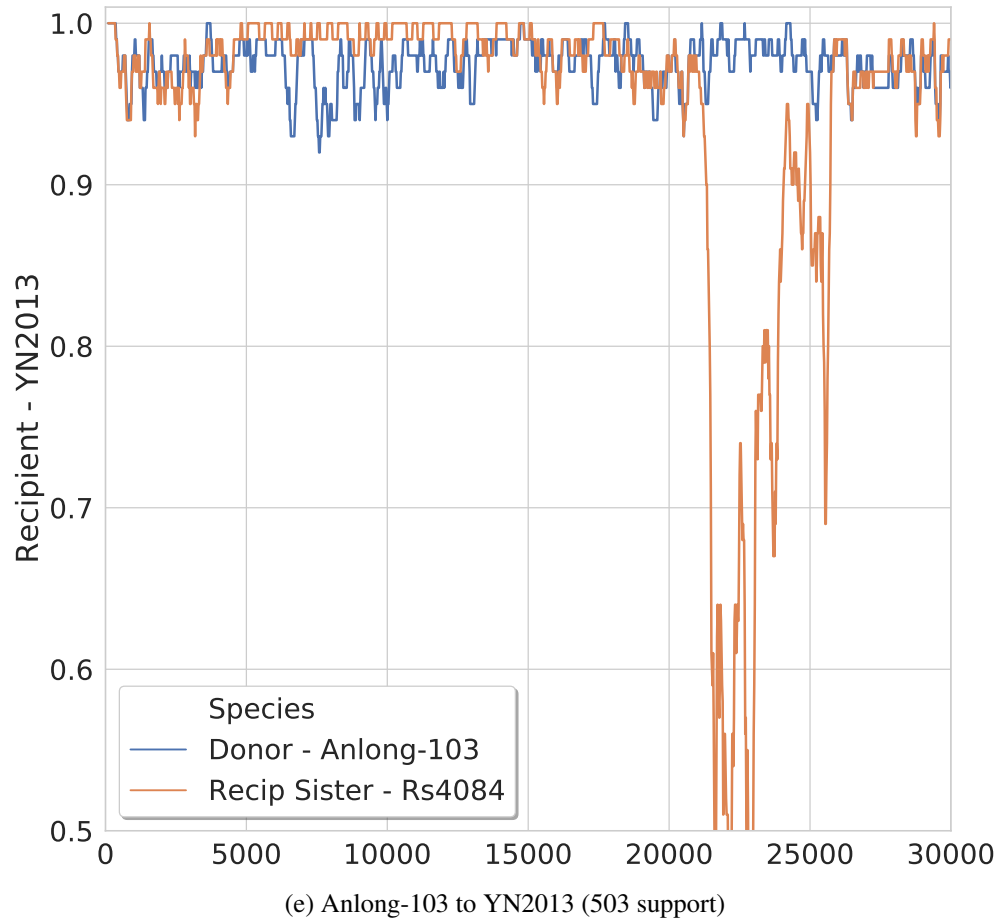

Figure S3: **SimPlot Validation of leaf-to-leaf HGTs.** Part (e): SimPlot for highly supported leaf-to-leaf HGT in the *spike* gene family from Anlong-103 to YN2013.

Table S1: List of strains included in analysis.

| Short ID   | NCBI Accession | Host Species | Collection Region | Collection Year |
|------------|----------------|--------------|-------------------|-----------------|
| Wuhan-Hu-1 | NC045512       | Human        | Hubei             | 2019            |
| SARS-CoV   | NC004718       | Human        | Toronto           | 2003            |
| RaTG13     | MN996532       | Bat          | Yunnan            | 2013            |
| CoVZC45    | MG772933       | Bat          | Zhejiang          | 2017            |
| CoVZXC21   | MG772934       | Bat          | Zhejiang          | 2015            |
| WIV16      | KT444582       | Bat          | Yunnan            | 2013            |
| Rs4231     | KY417146       | Bat          | Yunnan            | 2013            |
| YN2018B    | MK211376       | Bat          | Yunnan            | 2016            |
| Rs7327     | KY417151       | Bat          | Yunnan            | 2014            |
| Rs9401     | KY417152       | Bat          | Yunnan            | 2015            |
| Rs4084     | KY417144       | Bat          | Yunnan            | 2012            |
| WIV1       | KF367457       | Bat          | Yunnan            | 2012            |
| F46        | KU973692       | Bat          | Yunnan            | 2012            |
| Rf4092     | KY417145       | Bat          | Yunnan            | 2012            |
| YN2013     | KJ473816       | Bat          | Yunnan            | 2013            |
| Anlong-103 | KY770858       | Bat          | Guizhou           | 2013            |
| Rs4081     | KY417143       | Bat          | Yunnan            | 2012            |
| Rs4255     | KY417149       | Bat          | Yunnan            | 2013            |
| YN2018D    | MK211378       | Bat          | Yunnan            | 2016            |
| Rs672      | FJ588686       | Bat          | Guizhou           | 2006            |
| YN2018C    | MK211377       | Bat          | Yunnan            | 2016            |
| As6526     | KY417142       | Bat          | Yunnan            | 2014            |
| Rs4247_147 | KY417147       | Bat          | Yunnan            | 2013            |
| Rs4247_148 | KY417148       | Bat          | Yunnan            | 2013            |
| YN2018A    | MK211375       | Bat          | Yunnan            | 2016            |
| Rp3        | DQ071615       | Bat          | Guangxi           | 2004            |
| YNLF_31C   | KP886808       | Bat          | Yunnan            | 2013            |
| GX2013     | KJ473815       | Bat          | Guangxi           | 2013            |
| LYRa11     | KF569996       | Bat          | Yunnan            | 2011            |
| CpY11      | JX993988       | Bat          | Yunnan            | 2011            |
| SC2018     | MK211374       | Bat          | Sichuan           | 2016            |
| HuB2013    | KJ473814       | Bat          | Hubei             | 2013            |
| Rm1        | DQ412043       | Bat          | Hubei             | 2004            |
| 16BO133    | KY938558       | Bat          | South Korea       | 2016            |
| Rf1        | DQ412042       | Bat          | Hubei             | 2004            |
| 273_2005   | DQ648856       | Bat          | Hubei             | 2004            |
| HeB2013    | KJ473812       | Bat          | Hebei             | 2013            |
| Jiyuan.84  | KY770860       | Bat          | Henan             | 2012            |
| RpS11      | JX993987       | Bat          | Shaanxi           | 2011            |
| HKU3_7     | GQ153542       | Bat          | Hong Kong         | 2009            |
| HKU3_1     | DQ022305       | Bat          | Hong Kong         | 2005            |
| HKU3_12    | GQ153547       | Bat          | Hong Kong         | 2009            |
| BtKY72     | KY352407       | Bat          | Kenya             | 2007            |
| BM48-31    | NC014470       | Bat          | Bulgaria          | 2008            |
| P2V        | MT072864       | Pangolin     | Guangxi           | 2018            |
| P5E        | MT040336       | Pangolin     | Guangxi           | 2017            |
| P5L        | MT040335       | Pangolin     | Guangxi           | 2017            |
| P1E        | MT040334       | Pangolin     | Guangxi           | 2017            |
| P4L        | MT040333       | Pangolin     | Guangxi           | 2017            |
| C007       | AY572034       | Palm Civet   | Guangdong         | 2004            |
| A022       | AY686863       | Palm Civet   | Guangdong         | 2004            |
| C020       | AY572038       | Palm Civet   | Guangdong         | 2004            |
| C010       | AY572035       | Palm Civet   | Guangdong         | 2004            |
| B039       | AY686864       | Palm Civet   | Guangdong         | 2004            |

Table S2: **Three candidate strain trees are highly divergent.** (*Top*) The relatively high Robinson-Foulds (RF) and subtree prune and regraft (SPR) distances between pairs of strain trees indicates substantial differences between tree topologies, and suggest that substantial recombination has occurred throughout the *Sarbecovirus* subgenus. This result motivates the need for constructing a reliable strain tree using a non-recombinant region. (*Bottom*) We report the average normalized RF distance and SPR distance between trees constructed within a genomic region. We divided the genome into 5000-base pair regions and divided each region into 1000-base pair windows with a 500-base pair offset, reconstructed a phylogeny on each such window using RAxML, and computed all pairwise RF and SPR distances between the windows within each region. We show the average internal pairwise RF and SPR distances for each 5000-base pair region and compare to the average internal pairwise RF and SPR distances for the two putative non-recombinant regions. **NRR-B is more internally consistent than other genomic regions**, which suggests less recombination in this region and motivates its use as our strain tree for reconciliation. SPR distances were estimated using the treedist package (<https://rdr.io/cran/phangorn/man/treedist.html>).

| Genome Region              | Normalized RF Distance | SPR Distance |
|----------------------------|------------------------|--------------|
| Whole Genome vs. NRR-B     | 0.653                  | 18           |
| Whole Genome vs. NRR-A     | 0.615                  | 14           |
| NRR-A vs. NRR-B            | 0.788                  | 19           |
| 0 - 5000                   | 0.521                  | 12.57        |
| <b>4000 - 9000 (NRR-B)</b> | <b>0.487</b>           | <b>11.98</b> |
| 5000 - 10000               | 0.522                  | 12.79        |
| 10000 - 15000              | 0.567                  | 13.60        |
| 13000 - 18000 (NRR-A)      | 0.595                  | 13.82        |
| 15000 - 20000              | 0.580                  | 13.56        |
| 20000 - 25000              | 0.550                  | 13.08        |
| 25000 - 30000              | 0.565                  | 13.29        |

Table S3: **All HGTs with  $\geq 100$  support found by our analysis.** See separate spreadsheet.

Table S4: **Number of HGTs per gene family.** For each gene family, we show the alignment length and the number of HGT events found at varying levels of support: at least 100 (61.6 percentile), at least 500 (94.9 percentile), and at least 808 (98.4 percentile).

| Gene Family         | Alignment Length (bp) | HGTs               |                    |                    |
|---------------------|-----------------------|--------------------|--------------------|--------------------|
|                     |                       | $\geq 100$ support | $\geq 500$ support | $\geq 808$ support |
| <i>ORF1ab</i>       | 21,465                | 42                 | 11                 | 3                  |
| <i>spike</i>        | 3,896                 | 54                 | 13                 | 4                  |
| <i>ORF3a</i>        | 836                   | 47                 | 10                 | 6                  |
| <i>envelope</i>     | 231                   | 51                 | 0                  | 0                  |
| <i>membrane</i>     | 687                   | 63                 | 11                 | 3                  |
| <i>ORF6</i>         | 186                   | 50                 | 6                  | 2                  |
| <i>ORF7a</i>        | 376                   | 65                 | 12                 | 4                  |
| <i>ORF7b</i>        | 135                   | 48                 | 0                  | 0                  |
| <i>ORF8</i>         | 389                   | 68                 | 4                  | 1                  |
| <i>nucleocapsid</i> | 1,271                 | 74                 | 9                  | 2                  |
| <i>ORF10</i>        | 117                   | 26                 | 2                  | 0                  |
| Total               |                       | 588                | 78                 | 25                 |

Table S5: **Inferred HGTs in adjacent gene families likely recombined in a single event.** We randomly sampled 500,000 strain pairs from our data and randomly permuted the gene family ordering to estimate the probability  $\pi$  that a pair of strains with at least  $t$  supported HGTs has at least one window of size  $w$  with  $t$  HGTs in it by random association. We then performed a one-sided binomial test with probability of success  $\pi$ ,  $k$  strain pairs in our data that fit the  $(w, t)$  window condition, and  $n$  strain pairs that have at least  $t$  supported HGTs. Bold text indicates significance at  $\alpha = 0.007$ , after Bonferroni correction for 7 hypotheses tested. We find that when HGTs are inferred between the same pair of strains for two adjacent gene families, they were likely transferred together, but fail to make similar claims for larger numbers of grouped genes.

| $w$ | $t$ | $\pi$  | $n$ | $k$ | $p$           |
|-----|-----|--------|-----|-----|---------------|
| 2   | 2   | 0.2906 | 39  | 85  | <b>0.0007</b> |
| 3   | 2   | 0.4810 | 44  | 85  | 0.2848        |
| 3   | 3   | 0.1115 | 5   | 23  | 0.1053        |
| 4   | 3   | 0.2582 | 9   | 23  | 0.1136        |
| 4   | 4   | 0.0507 | 2   | 6   | 0.0336        |
| 5   | 4   | 0.1637 | 3   | 6   | 0.0595        |
| 5   | 5   | 0.0258 | 1   | 2   | 0.0509        |

Table S6: **Nodes with top 5% of HGTs in subtree rooted at node (normalized for size of subtree).**

| Node   | Node In | Node Out | Tree In (norm) | Tree Out (norm) |
|--------|---------|----------|----------------|-----------------|
| Rs4084 | 14      | 26       | 14.00          | 26.00           |
| n26    | 9       | 10       | 16.33          | 17.67           |
| n18    | 4       | 10       | 16.00          | 17.50           |
| Rs7327 | 15      | 17       | 15.00          | 17.00           |
| n34    | 8       | 3        | 12.50          | 19.00           |
| SC2018 | 20      | 11       | 20.00          | 11.00           |
| n24    | 5       | 10       | 17.00          | 14.00           |

## References

- M. F. Boni, P. Lemey, X. Jiang, T. T.-Y. Lam, B. W. Perry, T. A. Castoe, A. Rambaut, and D. L. Robertson. Evolutionary origins of the sars-cov-2 sarbecovirus lineage responsible for the covid-19 pandemic. *Nature Microbiology*, 5(11):1408–1417, Nov. 2020. ISSN 2058-5276. URL <https://doi.org/10.1038/s41564-020-0771-4>.
- Y. Guan, B. Zheng, Y. He, X. Liu, Z. Zhuang, C. Cheung, S. Luo, P. Li, L. Zhang, Y. Guan, et al. Isolation and characterization of viruses related to the sars coronavirus from animals in southern china. *Science*, 302(5643):276–278, 2003.
- I. Jungreis, R. Sealfon, and M. Kellis. Sars-cov-2 gene content and covid-19 mutation impact by comparing 44 sarbecovirus genomes. *Nature Communications*, 12(2642), 2021. doi: <https://doi.org/10.1038/s41467-021-22905-7>.
- V. Makarenkov, B. Mazoure, G. Rabusseau, and P. Legendre. Horizontal gene transfer and recombination analysis of SARS-CoV-2 genes helps discover its close relatives and shed light on its origin. *BMC Ecol Evo*, 21(5), 2021. URL <https://doi.org/10.1186/s12862-020-01732-2>.
- NCBI Resource Coordinators. Database resources of the National Center for Biotechnology Information. *Nucleic Acids Research*, 46(D1):D8–D13, Jan. 2018. doi: 10.1093/nar/gkx1095.
- M. A. Suchard, P. Lemey, G. Baele, D. L. Ayres, A. J. Drummond, and A. Rambaut. Bayesian phylogenetic and phylodynamic data integration using beast 1.10. *Virus evolution*, 4(29942656):vey016, 2018. ISSN 2057-1577. URL <https://www.ncbi.nlm.nih.gov/pmc/articles/PMC6007674/>.
- T. Zhang, Q. Wu, and Z. Zhang. Probable pangolin origin of sars-cov-2 associated with the covid-19 outbreak. *Current Biology*, 30(7):1346–1351, 2020.
